# Supplementary material for: The Repeat Region of the Circumsporozoite Protein is Critical for Sporozoite Formation and Maturation in Plasmodium
Source: PLOS journal article supplement (doi:10.1371/journal.pone.0113923), 2014-12-01
Supplement: S4 (10.1371/journal.pone.0113923.s004) [file journal.pone.0113923.s004]

Table S1

|                | WT     |        |        | $\Delta$ Rep |        |        | $\Delta$ N $\Delta$ Rep |     |     |
|----------------|--------|--------|--------|--------------|--------|--------|-------------------------|-----|-----|
|                | D13-14 | D18-19 | D21-22 | D13-14       | D18-19 | D21-22 | D14                     | D18 | D21 |
| <b>Exp 1*</b>  | 125    | 498    | 869    | 248          | 230    | 12.5   | 0                       | 0   | 0   |
| <b>Exp 2*</b>  | 324    | 896    | 1400   | 195          | 187    | 314    | 0                       | 0   | 0   |
| <b>Exp 3*</b>  | 861    | 2200   | 316    | 344          | 175    | 88     | 0                       | 0   | 0   |
| <b>Exp 4**</b> | 204    | 988    | 732    | 263          | 329    | 295    |                         |     |     |

Sporozoites per oocyst. At each of the indicated time points post infective bloodmeal, and for each of the indicated parasite lines, the number of sporozoites/oocyst is shown. This number was generated by dividing the average number of midgut sporozoites per mosquito by the average number of oocysts per mosquito. For Expts 1-3, 20 mosquitoes per point were used and for Expt 4, 10 mosquitoes per point were used.

|              | WT     |        |        | $\Delta$ Rep |        |        | $\Delta$ N $\Delta$ Rep |     |     |
|--------------|--------|--------|--------|--------------|--------|--------|-------------------------|-----|-----|
|              | D13-14 | D18-19 | D21-22 | D14-13       | D18-19 | D21-22 | D14                     | D18 | D21 |
| <b>Exp 1</b> | 23000  | 72320  | 85228  | 22100        | 13120  | 11500  | 0                       | 0   | 0   |
| <b>Exp 2</b> | 13950  | 52000  | 11000  | 10952        | 7680   | 25200  | 0                       | 0   | 0   |
| <b>Exp 3</b> | 26700  | 44000  | 13291  | 16000        | 10880  | 6300   | 0                       | 0   | 0   |
| <b>Exp 4</b> | 32400  | 118000 | 102437 | 18450        | 34000  | 20000  |                         |     |     |

Sporozoites per midgut. At each of the indicated time points post-infective bloodmeal, and for each of the parasite lines, the average number of midgut sporozoites per mosquito was calculated. For Expts 1-3, 20 mosquitoes per point were used and for Expt 4, 10 mosquitoes per point were used.
